# Supplementary material for: Does Osmotic Stress Affect Natural Product Expression in Fungi?
Source: MDPI journal article supplement (doi:10.3390/md15080254), 2017-08-13

## **SUPPLEMENTARY INFORMATION**

### **Does osmotic stress affect natural product expression in fungi?**

Overy DP<sup>1,2,3</sup>, Correa H<sup>1,4</sup>, Roullier C<sup>6</sup>, Chi W-C<sup>7,8</sup>, Pang K-L<sup>8</sup>, Rateb ME<sup>9,10</sup>, Ebel R<sup>9</sup>, Shang Z<sup>11</sup>, Capon RJ<sup>11</sup>, Bills GF<sup>12</sup>, Kerr RG<sup>1,4,5</sup>

**Figure S1:** Cluster analysis of pseudomolecular ions associated with known MS contaminants (i.e. plasticizers and detergents) originating from detergents and plastic ware commonly used in the laboratory.

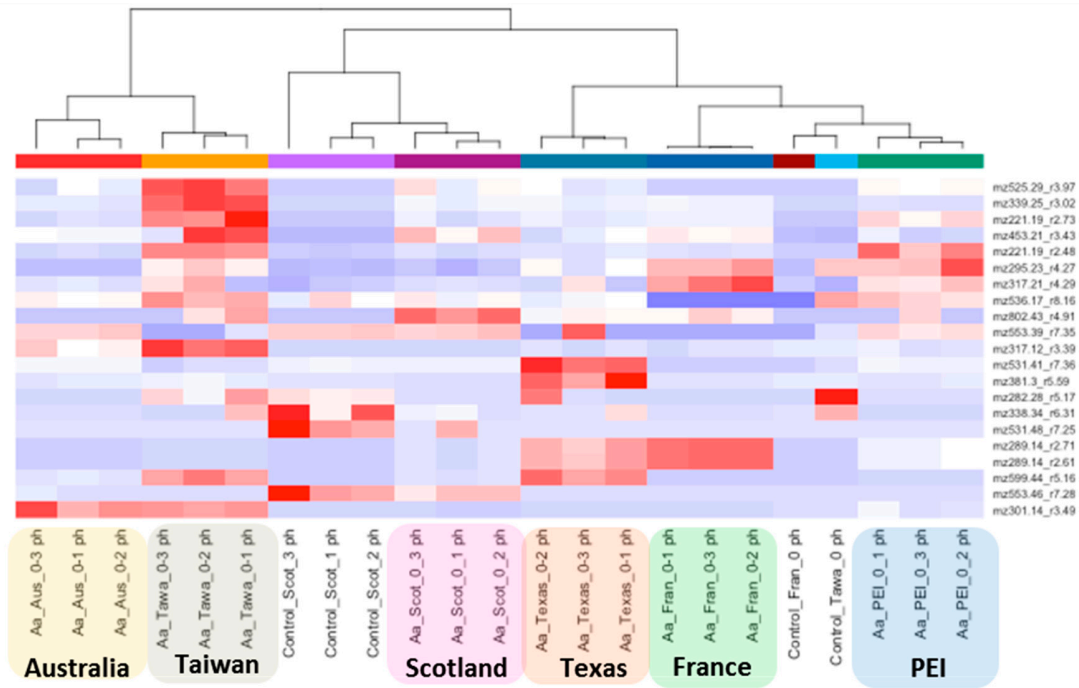

**Table S1:** Significant variable fold increases from pairwise comparisons (treatment vs 0% control) for each of the three individual ex-type strain datasets (**NOTE: See accompanying excel file to be used as Supplementary Table 1**).

The table displays a grid of data points, where each row represents a specific gene or variable and each column represents a pairwise comparison between two strains. The color coding indicates the magnitude of the fold increase: red for high values, green for moderate values, and blue/cyan for lower values. Numerical values are provided for each cell, representing the exact fold increase. The table is organized into several vertical sections, each with a header row. The rows are labeled with various identifiers, including 'Strain', 'Gene', and 'Fold Increase'. The columns are labeled with 'Strain 1', 'Strain 2', 'Strain 3', and 'Strain 4'. The table is very dense and contains a large amount of data.

**Figure S2:** Relevant pseudomolecular ion annotations and associated variable box plots for aculene A (ex-type strain ATCC 16872).

G100A08\_MG116\_A #721 RT: 2.44 AV: 1 NL: 1.32E6  
T: FTMS {1,1} + p ESI Full ms [190.00-2000.00]

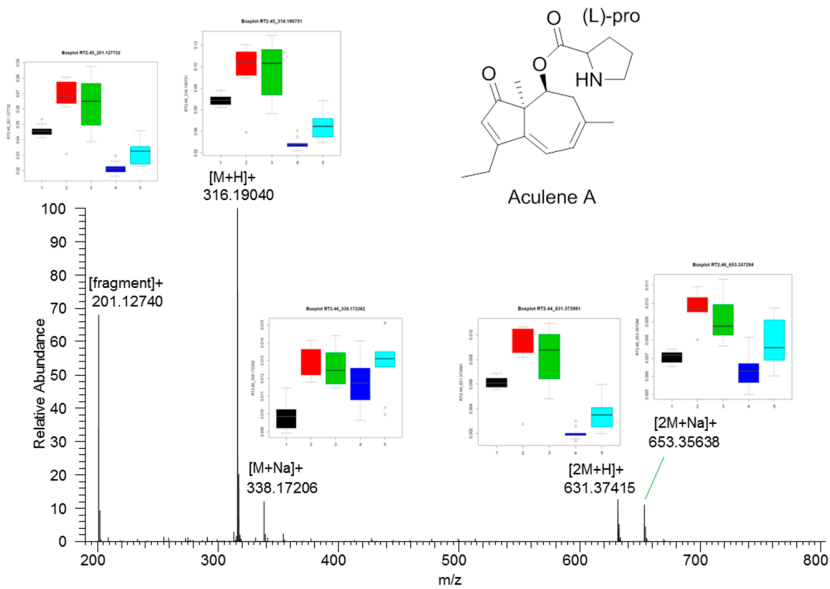

**Figure S3:** Relevant pseudomolecular ion annotations and associated variable box plots for aculene B (ex-type strain ATCC 16872).

0000A09\_MG135\_A #753 RT: 2.54 AV: 1 NL: 5.81E5  
T: FTMS {1,1} + p ESI Full lock ms [190.00-2000.00]

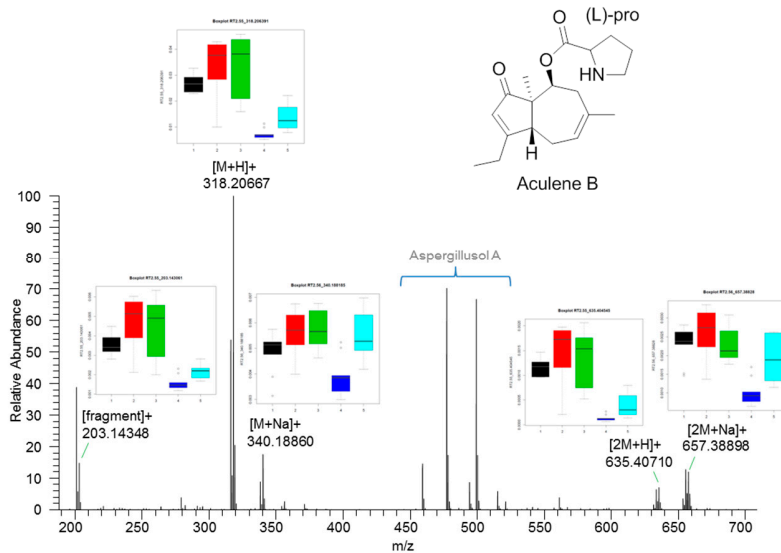

**Figure S4:** Relevant pseudomolecular ion annotations and associated variable box plots for aculene C (ex-type strain ATCC 16872).

S100A04\_MG094\_A #801-825 RT: 2.71-2.79 AV: 25 NL: 6.52E5  
T: FTMS {1,1} + p ESI Full lock ms [190.00-2000.00]

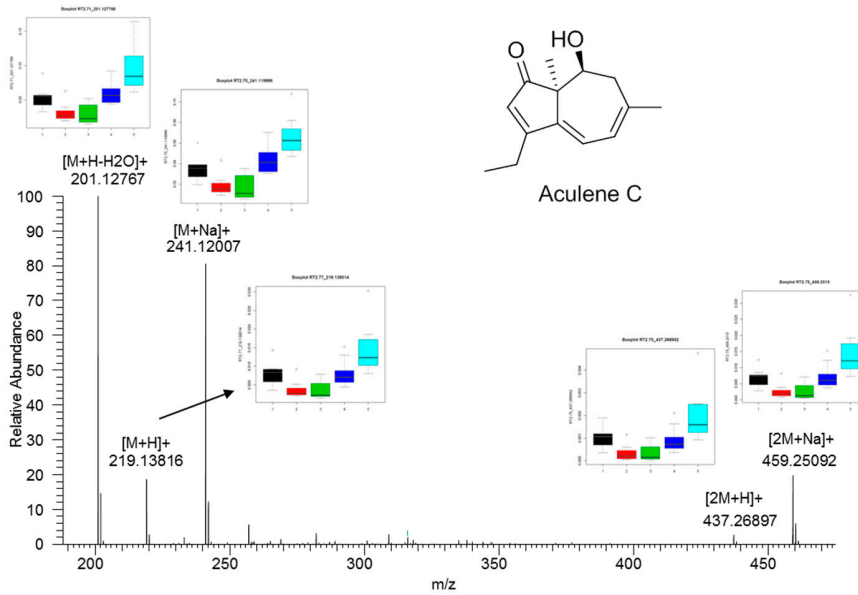

**Figure S5:** Relevant pseudomolecular ion annotations and associated variable box plots for aculene D (ex-type strain ATCC 16872).

S100A07\_MG097\_A #879 RT: 2.97 AV: 1 NL: 2.86E5  
T: FTMS {1,1} + p ESI Full lock ms [190.00-2000.00]

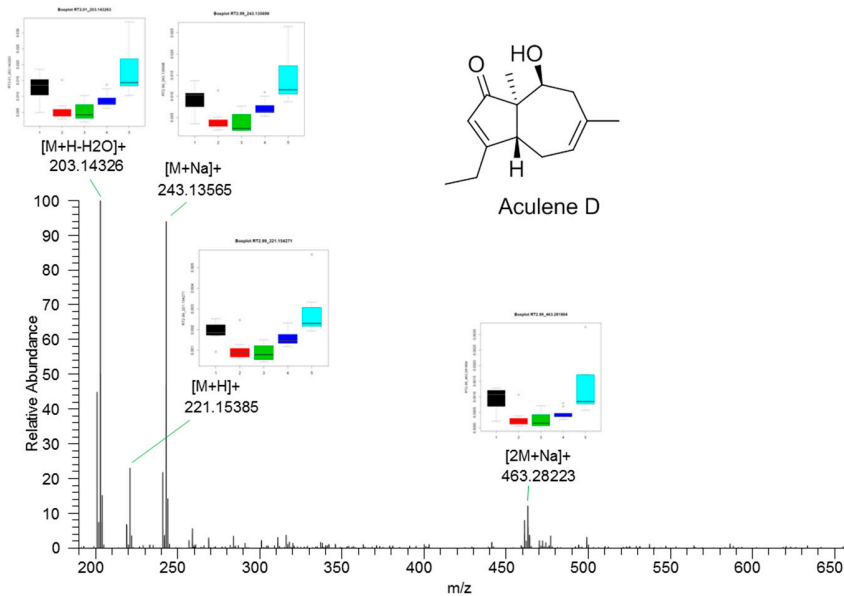

**Figure S6:** Relevant pseudomolecular ion annotations and associated variable box plots for asperaculane (ex-type strain NRRL 20623).

S050P09\_MG018\_A #798 RT: 2.70 AV: 1 NL: 2.29E5  
T: FTMS {1,1} + p ESI Full lock ms [190.00-2000.00]

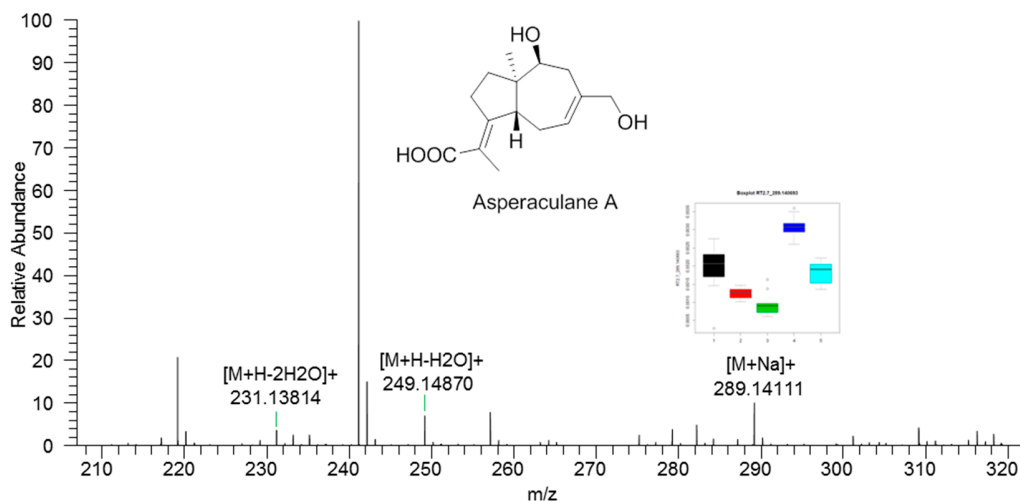

**Figure S7:** Relevant pseudomolecular ion annotations and associated variable box plots for aspergillusol (ex-type strain ATCC 16872).

S100A04\_MG094\_A #752 RT: 2.54 AV: 1 NL: 8.40E5  
T: FTMS {1,1} + p ESI Full ms [190.00-2000.00]

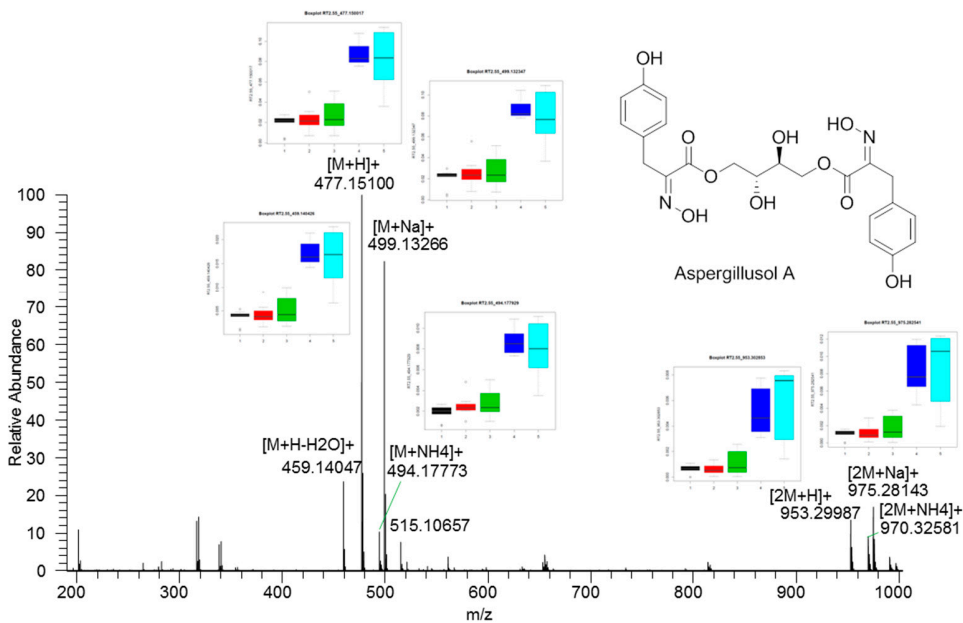

**Figure S8:** Relevant pseudomolecular ion annotations and associated variable box plots for aculin A (ex-type strain BCRC 32190).

S100T05\_MG050\_A #964 RT: 3.26 AV: 1 NL: 1.04E5  
T: FTMS {1,1} +p ESI Full lock ms [190.00-2000.00]

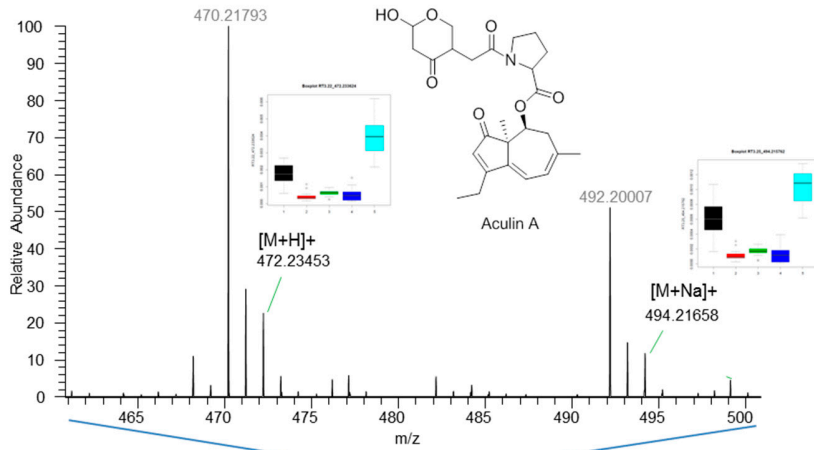

S100T05\_MG050\_A #964 RT: 3.26 AV: 1 NL: 1.04E5  
T: FTMS {1,1} +p ESI Full lock ms [190.00-2000.00]

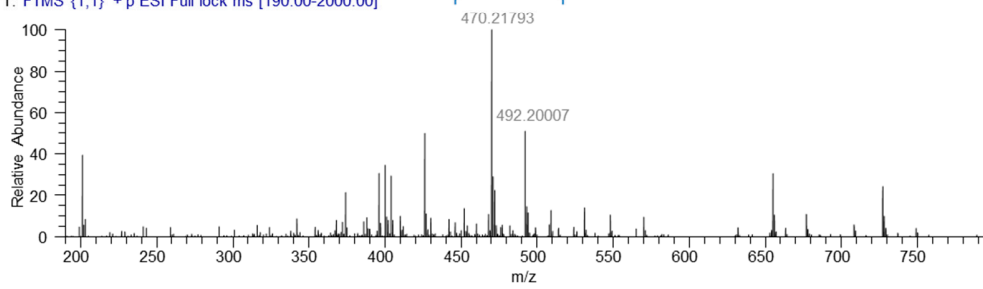

**Figure S9:** Relevant pseudomolecular ion annotations and associated variable box plots for CJ-15,183 (ex-type strain NRRL 20623).

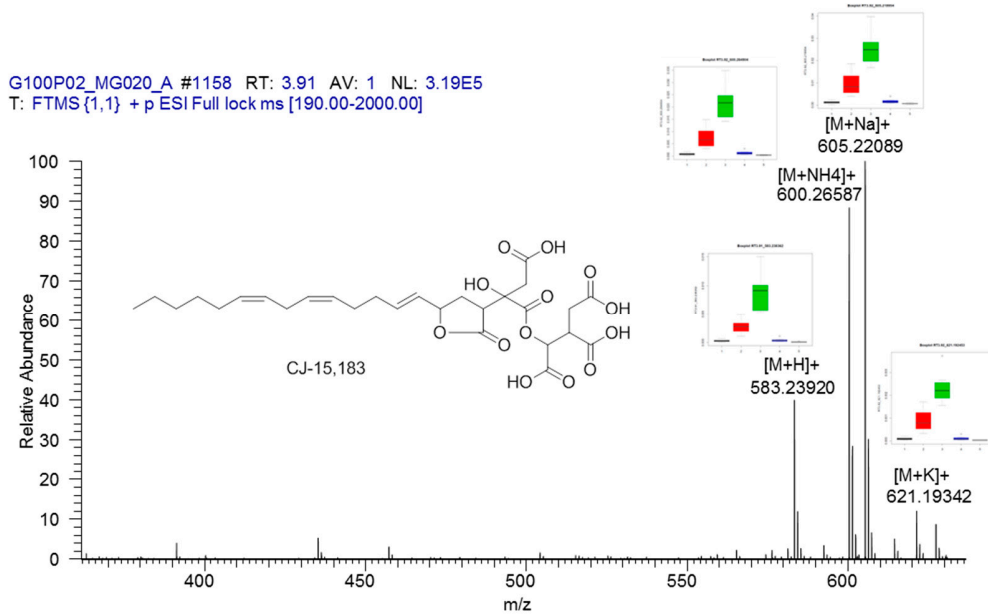

**Figure S10:** Relevant pseudomolecular ion annotations and associated variable box plots for CJ-15,183 (ex-type strain NRRL 20623).

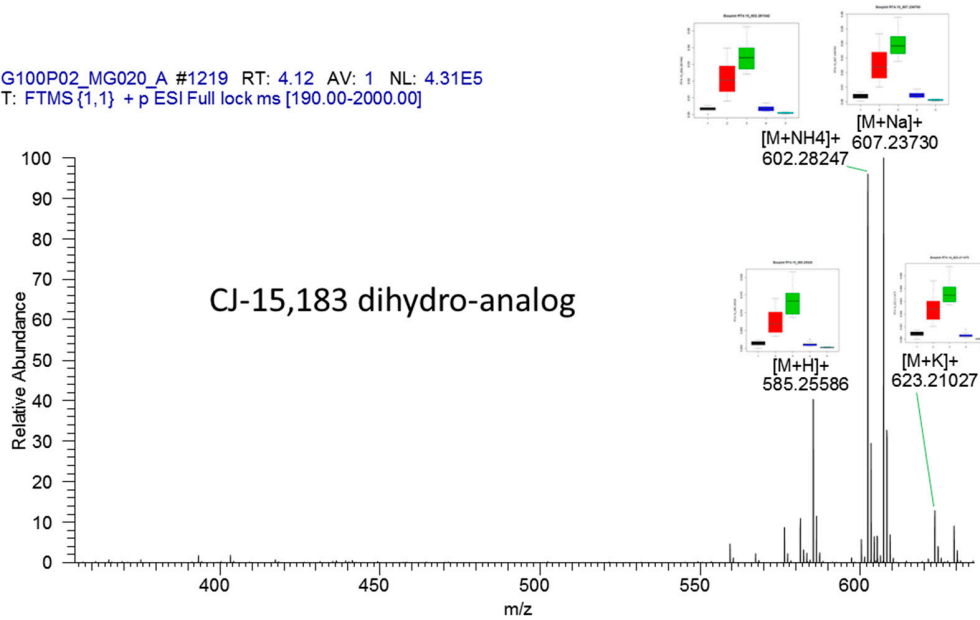



**Figure S11:** Relevant pseudomolecular ion annotations and associated variable box plots for secalonic acid (most likely secalonic acid D) (ex-type strain ATCC 16872).

S100A04\_MG094\_A #1117 RT: 3.78 AV: 1 NL: 9.32E5  
 T: FTMS{1,1} + p ESI Full lock ms [190.00-2000.00]

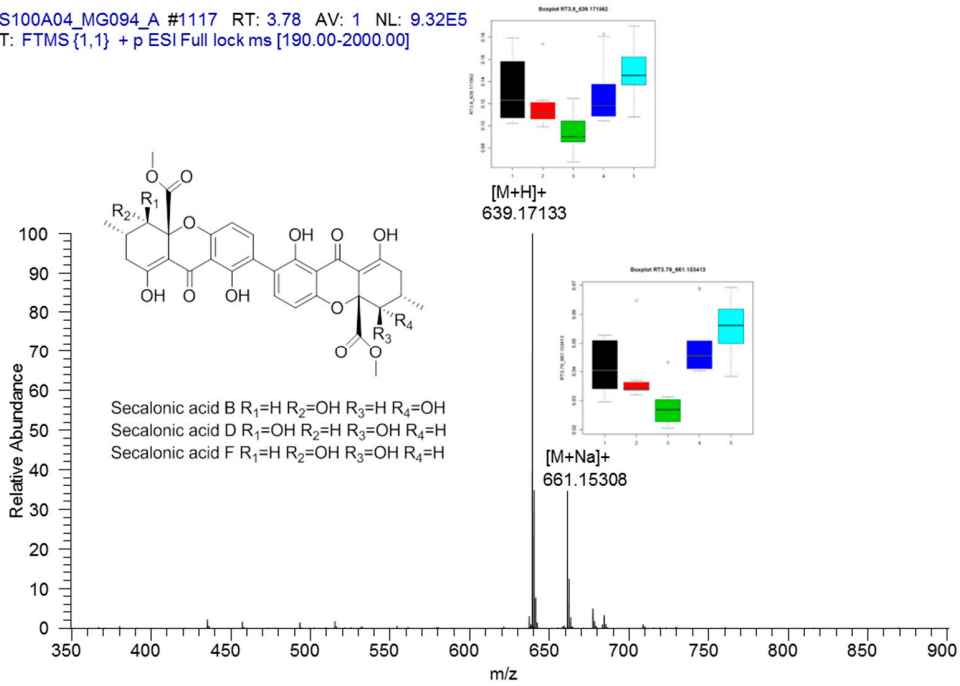

**Figure S12:** Relevant pseudomolecular ion annotations and associated variable box plots for acu-dioxomorpholine (ex-type strain ATCC 16872).

S100A04\_MG094\_A #1311-1337 RT: 4.43-4.52 AV: 27 NL: 3.97E5  
 T: FTMS{1,1} + p ESI Full lock ms [190.00-2000.00]

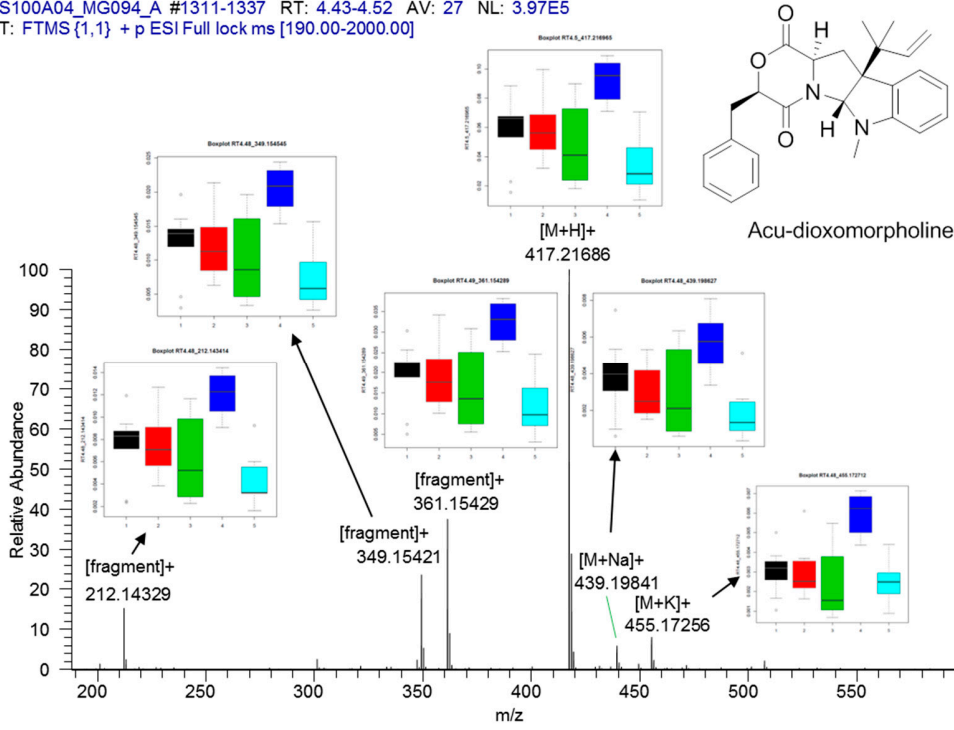

Supplement: s1 [file s1]
